# Supplementary material
Source: Springer Nature journal article supplement (https://www.springermedizin.de/resource/supplementary/12885_2008_1759_MOESM2_ESM.pdf/9472866)

A)

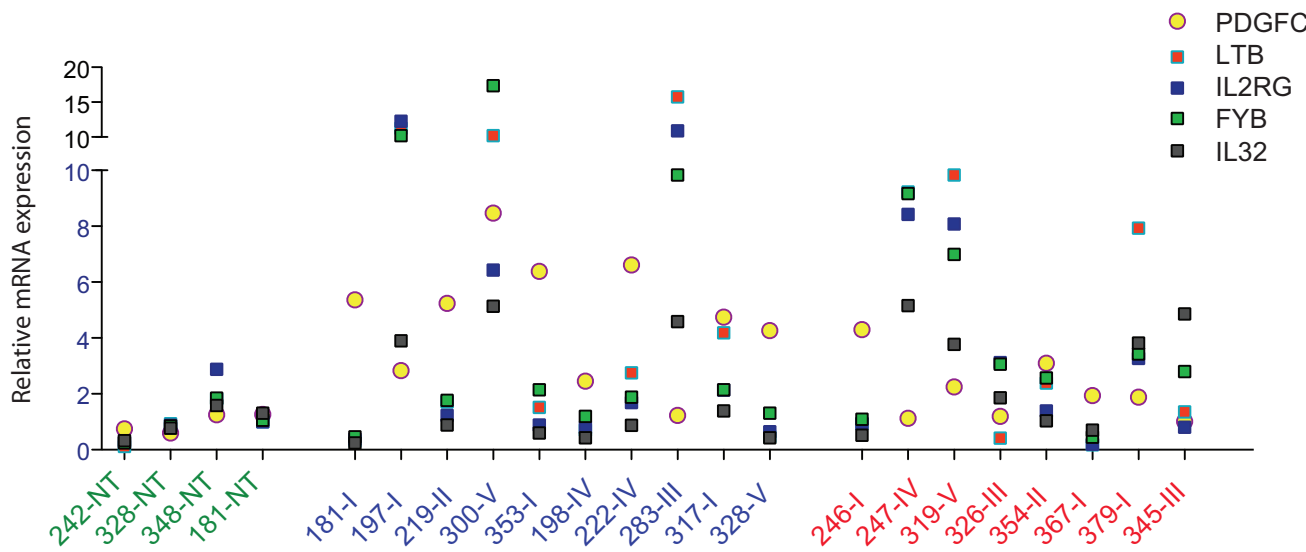

B)

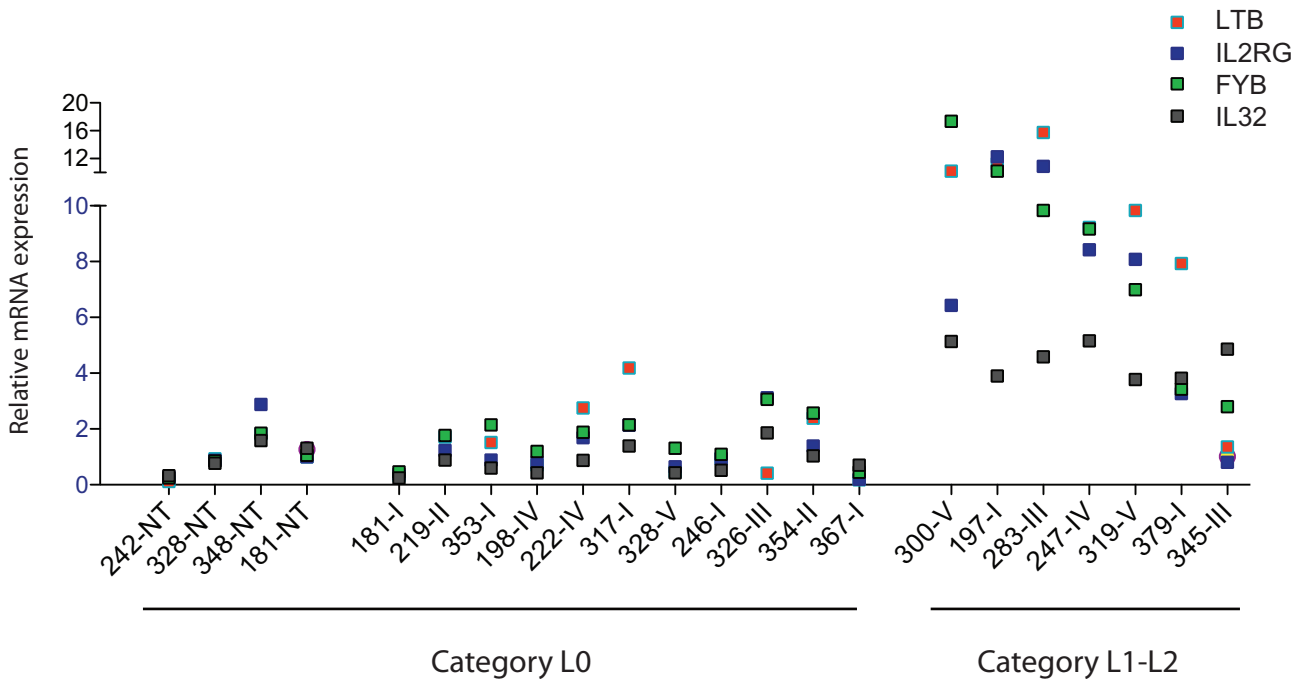

Supplement: MOESM2 [file 9472866]
